# Supplementary material
Source: PubMed Central journal article supplement (PMC6641260)
Supplement: ao7b01425_si_001.pdf [file ao7b01425_si_001.pdf]

**Supporting Information:**

**Reassessment of the Four-Point Approach to the  
Electron Transfer Marcus-Hush Theory**

Omar López-Estrada<sup>†,\*</sup>, Humberto G. Laguna<sup>†</sup>, Cihuapilli Barrueta-Flores<sup>†</sup>, and  
Carlos Amador-Bedolla<sup>†\*</sup>

<sup>†</sup> *Departamento de Física y Química Teórica, Facultad de Química, Universidad Nacional  
Autónoma de México, Cd. Universitaria, Av. Universidad 3000, CP 04510, Ciudad de  
México, México*

E-mail: omar.lopez.e@gmail.com; carlos.amador@unam.mx

## Transition state energy for $k_1 \neq k_2$

Let us start with properly generalized Equations 1 for the parabolas in Figure 2 of the manuscript,

$$G_1(x) = G_1^0 + k_1(x - x_1)^2,$$

$$G_2(x) = G_2^0 + k_2(x - x_2)^2$$

and find the intersection by solving,

$$(k_2 - k_1)x^2 - 2(k_2x_2 - k_1x_1)x + (G_2^0 - G_1^0 + k_2x_2^2 - k_1x_1^2) = 0,$$

then we get the analytical solution

$$x_{\pm} = \frac{k_2x_2 - k_1x_1 \pm \sqrt{\Delta G^0 (k_1 - k_2) + k_1 k_2 (x_2 - x_1)^2}}{k_2 - k_1}$$

and rewritten it as,

$$x_{\pm} = \frac{k_2x_2 - k_1x_1 \pm \sqrt{1 + \frac{\Delta G^0 (k_1 - k_2)}{k_1 k_2 (x_2 - x_1)^2}}}{k_2 - k_1}$$

it is apparent that the first term of the Taylor expansion (valid for  $k_1 \approx k_2$ ) are

$$x_+ = \frac{\Delta G^0 + k_2x_2^2 - k_1x_1^2}{2(k_2x_2 - k_1x_1)},$$

and

$$x_- = \frac{2(k_1x_1 - k_2x_2)}{k_1 - k_2},$$

From the analytical solution we found the transition state energy

$$\Delta G^\ddagger = \frac{k_1 \left[ k_2 (x_2 - x_1) \pm \sqrt{k_1 k_2 (x_2 - x_1)^2 \left( 1 + \frac{\Delta G^0 (k_1 - k_2)}{k_1 k_2 (x_2 - x_1)^2} \right)} \right]^2}{(k_2 - k_1)^2}.$$

whose first order term of their Taylor expansion,  $\Delta G_+^\ddagger$  (for  $k_1 \approx k_2$ ) is presented in Equation 4 of the manuscript.

In comparison with the symmetric Marcus-Hush theory, the existence of two distinct curvatures ( $k_1 \neq k_2$ ) introduces two intersection points between the parabolas (Figure S1). The left intersection point has coordinates  $(x_a, G(x_a))$ , and the physically pointless energy barrier can be estimated by  $\Delta G_{x_a} = G(x_a) - G_1^0$ . At this point an interesting question appears, can Marcus-Hush formula (Equation 2 of the manuscript) distinguish the physical situation from the non-physical one? Employing the quadratic equations the coordinates of the minimum in each parabola ( $x_1, G_1^0, x_2, G_2^0$ ) and their corresponding curvatures ( $k_1$  and  $k_2$  respectively) can be calculated as summarized in Table 2 of the manuscript. From the knowledge of the analytical parameters the energy barrier for the parabolas in Figure S1 can be obtained. Results are summarized in Table S1 where the last two columns show the data obtained by means of the Taylor series approximation (Equation 4 of the manuscript).

From the data in Table S1, the consistency between the Taylor expansion solution (Equation 4 of the manuscript that yields Marcus-Hush formula when  $k_1 = k_2$ ) and the analytical one can be checked. The result is remarkable because the  $x_+$  value obtained by means of the Taylor expansion is far from both the unphysical and physical solutions. Hence the approximated value ( $\Delta G_+^\ddagger$ ) is far from the analytical result ( $\Delta G^\ddagger$ ). It should also be mentioned that the first order Taylor expanded  $x_-$  solution is even worse, as expected from the divergence of the corresponding expression ( $x_- = 4.487$  and  $\Delta G_-^\ddagger = 0.4455$ ).

We emphasize that the approximate solution presented in equation 4 of the manuscript is accurate only in the vicinity of  $k_1 \approx k_2$ , and any deviation from that situation leads to wrong values, as can be concluded from the results shown in Table S1. For this system

the ratio between curvatures is  $k_1/k_2 \approx 2.02$ , and the value obtained by the approximate solution is two orders of magnitude larger than the analytical result.

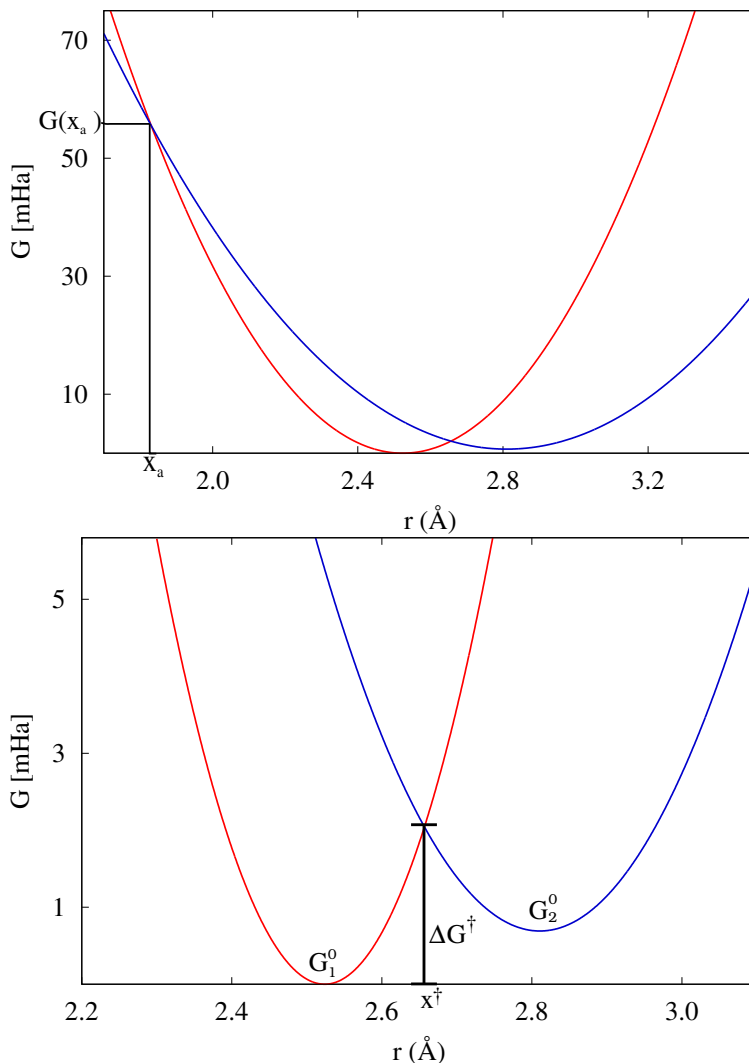

Figure S1: Top: Free Gibbs energy for the  ${}^3\Sigma_g^-$  (blue) and  ${}^3\Pi_u$  (red) electronic states employing the analytical quadratic equation. Bottom: The local minima ( $G_1^0(x_1)$  and  $G_2^0(x_2)$ ) are expanded and  $\Delta G^\ddagger$  is shown.

**Table S1: Reaction coordinates (in Å) for the non-physical intersection point  $x_a$ , the physical  $x^\ddagger$ , and the obtained by the Taylor expansion  $x_+^\ddagger$ . Their respective energy barriers  $\Delta G$  (in Hartrees) are indicated.**

| $x_a$ | $\Delta G_{x_a}$ | $x^\ddagger$ | $\Delta G^\ddagger$ | $x_+^\ddagger$ | $\Delta G_+^\ddagger$ |
|-------|------------------|--------------|---------------------|----------------|-----------------------|
| 1.830 | 0.0556           | 2.657        | $2.044(10^{-3})$    | 1.084          | 0.2397                |

# Energetic properties of the studied molecules

Table S2: Total energy (E in Hartrees) and Gibbs free energy (G in Hartrees) in their respectively ID geometries (Figure 5) for the neutral optimized structures (Opt) and the anion single point (SP) computations at the geometries obtained after been optimized at the  $\omega$ B97XD/cc-pVTZ theory level.

| ID  | Neutral Opt |            | Anion SP   |            |
|-----|-------------|------------|------------|------------|
|     | E           | G          | E          | G          |
| A1  | -845.7633   | -845.6953  | -845.8277  | -845.7623  |
| A2  | -601.1618   | -601.1036  | -601.2490  | -601.1978  |
| A3  | -1485.1249  | -1485.1010 | -1485.2496 | -1485.2286 |
| A4  | -778.4139   | -778.3950  | -778.4940  | -778.4790  |
| A5  | -678.5386   | -678.4506  | -678.6660  | -678.5800  |
| A6  | -575.1447   | -574.9469  | -575.0768  | -574.8819  |
| A7  | -1188.9379  | -1188.8063 | -1189.0262 | -1188.8933 |
| A8  | -872.5784   | -872.4342  | -872.6345  | -872.4900  |
| A9  | -1026.2288  | -1026.0373 | -1026.3012 | -1026.1095 |
| A10 | -1192.7191  | -1192.5380 | -1192.7853 | -1192.6054 |
| A11 | -1749.8174  | -1749.5756 | -1749.8982 | -1749.6627 |
| A12 | -1605.3791  | -1605.0296 | -1605.3791 | -1605.0296 |
| D1  | -468.1427   | -467.9120  | -468.0698  | -467.8511  |
| D2  | -389.5189   | -389.3451  | -389.4462  | -389.2728  |
| D3  | -366.2155   | -366.0731  | -366.1453  | -366.0132  |
| D4  | -385.8775   | -385.7588  | -385.8547  | -385.7431  |
| D5  | -614.9391   | -614.7628  | -614.9019  | -614.7369  |
| D6  | -578.8210   | -578.6345  | -578.8293  | -578.6467  |
| D7  | -655.0628   | -654.8635  | -655.0664  | -654.8729  |
| D8  | -556.7700   | -556.6001  | -556.7413  | -556.5785  |
| D9  | -693.1548   | -692.9508  | -693.1272  | -692.9258  |
| D10 | -1036.7472  | -1036.4555 | -1036.7259 | -1036.4418 |

**Table S3:** Total energy (E in Hartrees) and Gibbs free energy (G in Hartrees) in their respectively ID geometries (Figure 5) for the anion optimized structures (Opt) and the neutral single point (SP) computations at the geometries obtained after been optimized at the  $\omega$ B97XD/cc-pVTZ theory level.

| ID  | Anion Opt  |            | Neutral SP |            |
|-----|------------|------------|------------|------------|
|     | E          | G          | E          | G          |
| A1  | -845.8379  | -845.7733  | -845.7524  | -845.6819  |
| A2  | -601.2542  | -601.1990  | -601.1567  | -601.0976  |
| A3  | -1485.2593 | -1485.2364 | -1485.1152 | -1485.0900 |
| A4  | -778.5084  | -778.4917  | -778.3997  | -778.3803  |
| A5  | -678.6735  | -678.5872  | -678.5314  | -678.4426  |
| A6  | -575.0810  | -574.8873  | -575.1404  | -574.9422  |
| A7  | -1189.0356 | -1188.9063 | -1188.9283 | -1188.7946 |
| A8  | -872.6447  | -872.5024  | -872.5683  | -872.4216  |
| A9  | -1026.3095 | -1026.1182 | -1026.2206 | -1026.0259 |
| A10 | -1192.7954 | -1192.6195 | -1192.7088 | -1192.5251 |
| A11 | -1749.9078 | -1749.6698 | -1749.8075 | -1749.5640 |
| A12 | -1605.4327 | -1605.0906 | -1605.3719 | -1605.0209 |
| D1  | -468.0799  | -467.8589  | -468.1307  | -467.8994  |
| D2  | -389.4581  | -389.2918  | -389.5085  | -389.3313  |
| D3  | -366.1567  | -366.0237  | -366.2028  | -366.0618  |
| D4  | -385.8606  | -385.7492  | -385.8717  | -385.7541  |
| D5  | -614.9094  | -614.7424  | -614.9310  | -614.7563  |
| D6  | -578.8342  | -578.6532  | -578.8161  | -578.6295  |
| D7  | -655.0718  | -654.8785  | -655.0575  | -654.8584  |
| D8  | -556.7474  | -556.5854  | -556.7637  | -556.5941  |
| D9  | -693.1296  | -692.9309  | -693.1520  | -692.9481  |
| D10 | -1036.7309 | -1036.4469 | -1036.7340 | -1036.4422 |

**Table S4: Differences between data calculated with  $\bar{\lambda}_1$  and  $\bar{\lambda}_3$  plotted in Figure 7 of the paper.  $\Delta\Delta G^\dagger = \Delta G^\dagger(\bar{\lambda}_3) - \Delta G^\dagger(\bar{\lambda}_1)$  in eV.**

| D-A pair | $\Delta\Delta G^\dagger$ | D-A pair | $\Delta\Delta G^\dagger$ | D-A pair | $\Delta\Delta G^\dagger$ |
|----------|--------------------------|----------|--------------------------|----------|--------------------------|
| A2-D9    | 1.676                    | A3-D6    | 0.073                    | A11-D3   | 0.029                    |
| A2-D4    | 0.542                    | A11-D8   | 0.073                    | A4-D10   | 0.028                    |
| A2-D8    | 0.341                    | A12-D10  | 0.068                    | A9-D10   | 0.027                    |
| A3-D9    | 0.295                    | A3-D10   | 0.066                    | A9-D8    | 0.024                    |
| A2-D6    | 0.246                    | A7-D1    | 0.062                    | A5-D6    | 0.023                    |
| A2-D2    | 0.243                    | A6-D10   | 0.061                    | A3-D3    | 0.023                    |
| A11-D9   | 0.235                    | A3-D7    | 0.057                    | A8-D1    | 0.022                    |
| A2-D7    | 0.228                    | A9-D2    | 0.053                    | A1-D10   | 0.021                    |
| A5-D10   | 0.213                    | A2-D10   | 0.052                    | A5-D8    | 0.019                    |
| A2-D5    | 0.192                    | A10-D10  | 0.050                    | A12-D5   | 0.019                    |
| A5-D9    | 0.142                    | A11-D6   | 0.047                    | A11-D10  | 0.019                    |
| A3-D2    | 0.130                    | A1-D9    | 0.046                    | A4-D4    | 0.018                    |
| A3-D4    | 0.127                    | A4-D9    | 0.044                    | A1-D4    | 0.018                    |
| A11-D2   | 0.102                    | A5-D4    | 0.042                    | A8-D2    | 0.015                    |
| A11-D4   | 0.101                    | A11-D7   | 0.042                    | A9-D6    | 0.014                    |
| A2-D3    | 0.096                    | A10-D1   | 0.039                    | A7-D2    | 0.014                    |
| A9-D9    | 0.089                    | A4-D2    | 0.037                    | A12-D3   | 0.014                    |
| A7-D10   | 0.089                    | A11-D5   | 0.037                    | A4-D8    | 0.012                    |
| A5-D1    | 0.087                    | A1-D2    | 0.036                    | A1-D8    | 0.012                    |
| A3-D8    | 0.085                    | A9-D4    | 0.035                    | A9-D7    | 0.011                    |
| A5-D2    | 0.080                    | A3-D5    | 0.031                    |          |                          |
| A12-D1   | 0.076                    | A8-D10   | 0.030                    |          |                          |

# Sample Gaussian input files for A1 molecule

Table S5: Gaussian input for computation of the ground state energetic properties of neutral A1 molecule.

```
=====
%chk=str.chk
%mem=60Gb
%nproc=16
# Opt=(CalcFC,MaxCycles=900) Freq wB97XD/cc-pVTZ scf=xqc

Title

0 1
C      0.29007864  -0.73747037   0.00068200
C      1.68523864  -0.73747037   0.00068200
C      2.38277664   0.47028063   0.00068200
C      1.68512264   1.67878963  -0.00051700
C      0.29029764   1.67871163  -0.00099600
C     -0.40730336   0.47050563   0.00000000
H     -0.25968036  -1.68978737   0.00113200
H      3.48245664   0.47036063   0.00131600
H     -0.25982436   2.63099263  -0.00194900
N      2.42060380   2.95156905  -0.00059587
N     -1.87730332   0.47075027  -0.00024063
N      2.41981133  -2.01077311   0.00243987
O      3.20284022  -2.08087188   1.11219296
O      3.20050133  -2.08528723  -1.10867253
O      2.09369446   3.66398426  -1.11198908
O      2.09095115   3.66570710   1.10887967
O     -2.33092464  -0.16933771   1.11066669
O     -2.33056141  -0.17123053  -1.11020359
=====
```



**Table S6: Gaussian input for computation of the single point energetic properties of the anionic A1 but in the coordinates of the ground state neutral A1.**

---

---

```
%chk=str.chk  
%mem=60Gb  
%nproc=16  
# Freq wB97XD/cc-pVTZ scf=xqc geom=check
```

Title

-1 2

---

---

## Calculation of the activation energy of D1-A1 pair

First we remember that the reaction we consider is

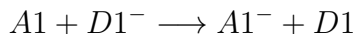

We follow Figure 1 of the manuscript. Computation of the minimum of the left parabola,  $G_1(x_1)$ , requires the ground state of the neutral A1 species ( $-845.6953$  Ha from Table S2 above) and the ground state of the anionic D1 species ( $-467.8589$  Ha from Table S3 above). Summing these two Free Gibbs energies we get  $G_1(x_1) = G_1^0 = -1313.5542$  Ha.

Conversely, computation of the minimum of the right parabola,  $G_2(x_2)$ , requires the ground state of the anionic A1 species ( $-845.7733$  Ha from Table S3 above) and the ground state of the neutral D1 species ( $-467.9120$  Ha from Table S2 above). Summing these two Free Gibbs energies we get  $G_2(x_2) = G_2^0 = -1313.6853$  Ha.

Then  $\Delta G^0 = -0.1311$  Ha.

Now computation of  $G_2(x_1)$ , requires a single point calculation of the anionic A1 species but in the coordinates of the neutral ground state of A1 ( $-845.7623$  Ha from Table S2 above) and a single point calculation of the neutral D1 species but in the coordinates of the the anionic ground state of D1 ( $-467.8994$  Ha from Table S3 above). Summing these two Free Gibbs energies we get  $G_2(x_1) = -1313.6617$  Ha.

Conversely, computation of  $G_1(x_2)$ , requires a single point calculation of the neutral A1 species but in the coordinates of the anionic ground state of A1 ( $-845.6819$  Ha from Table S3 above) and a single point calculation of the anionic D1 species but in the coordinates of the the neutral ground state of D1 ( $-467.8511$  Ha from Table S2 above). Summing these two Free Gibbs energies we get  $G_1(x_2) = -1313.5330$  Ha.

Now, computation of the reorganization energies requires proper equation similar to

equation 3 of the manuscript. First we proceed to compute  $\lambda_1$  through

$$G_2(x_1) - G_1(x_1) = \lambda_1 + \Delta G^0,$$

$$\lambda_1 = -1313.6617 + 1313.5542 + 0.1311 = 0.0236 \text{ Ha}$$

and to compute  $\lambda_2$  we use

$$G_1(x_2) - G_2(x_2) = \lambda_2 - \Delta G^0,$$

$$\lambda_2 = -1313.5330 + 1313.6853 - 0.1311 = 0.0212 \text{ Ha.}$$

Reorganization energies in eV are,

$$\lambda_1 = 0.642 \text{ eV},$$

$$\lambda_2 = 0.577 \text{ eV}.$$

Now we proceed to compute the different averages according to equations 8–11 of the manuscript, and substitute them in equation 2 of the manuscript in order to compute the activation energies. Results are presented in the following table.

**Table S7: Activation energies  $\Delta G^\ddagger$  (in eV) computed with the different reorganization energies for the D1-A1 pair.**

| $\lambda$         | $\Delta G^\ddagger$ |
|-------------------|---------------------|
| $\lambda_1$       | 3.879               |
| $\lambda_2$       | 3.337               |
| $\bar{\lambda}_1$ | 3.593               |
| $\bar{\lambda}_2$ | 3.608               |
| $\bar{\lambda}_3$ | 3.600               |
| $\bar{\lambda}_4$ | 3.600               |

# Figures

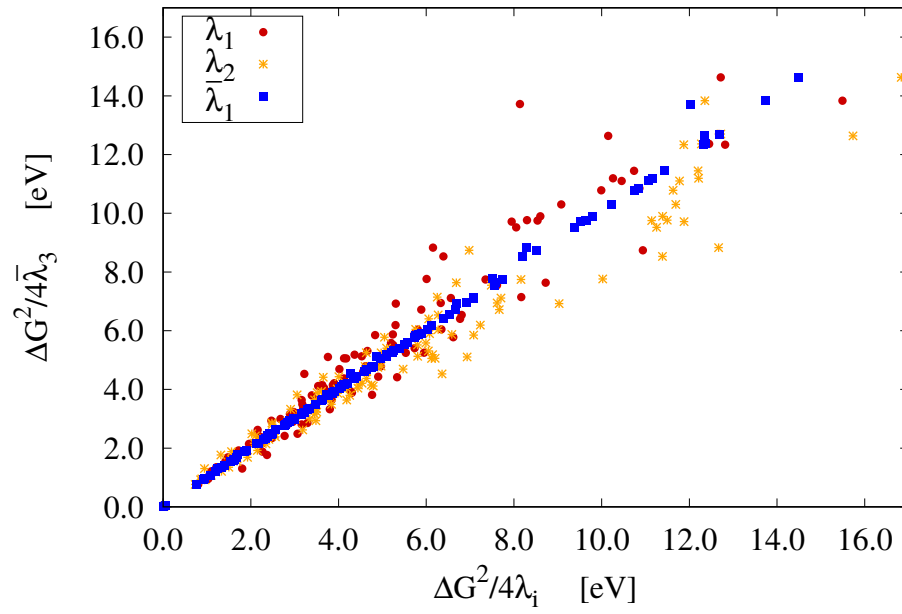

Figure S2: Comparison of  $\frac{\Delta G^2}{4\lambda}$  calculated with  $\bar{\lambda}_1$ ,  $\lambda_1$  or  $\lambda_2$  and those calculated with  $\bar{\lambda}_3$ .

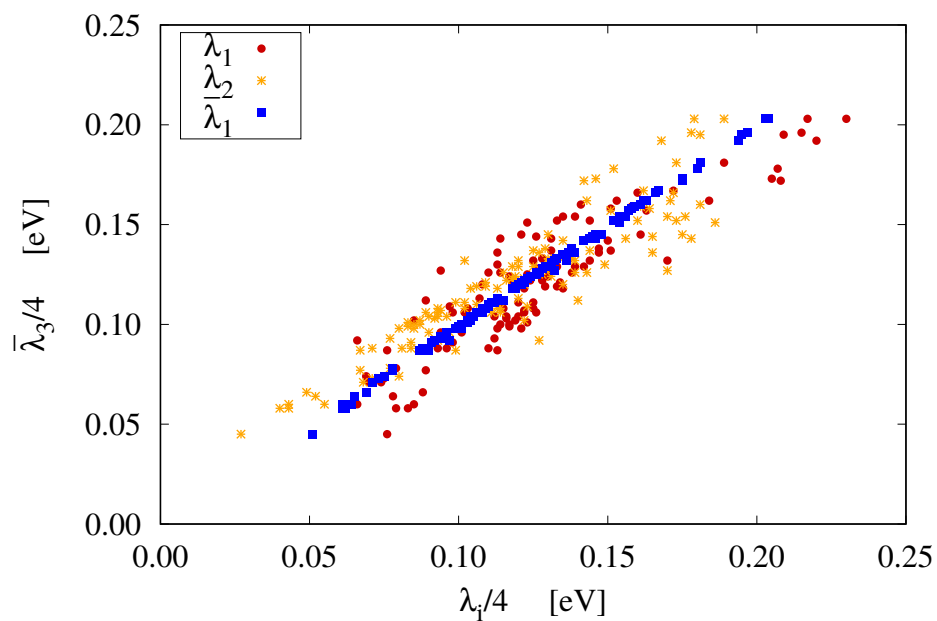

Figure S3: Comparison of  $\frac{\lambda}{4}$  calculated with  $\bar{\lambda}_1$ ,  $\lambda_1$  or  $\lambda_2$  and those calculated with  $\bar{\lambda}_3$ .

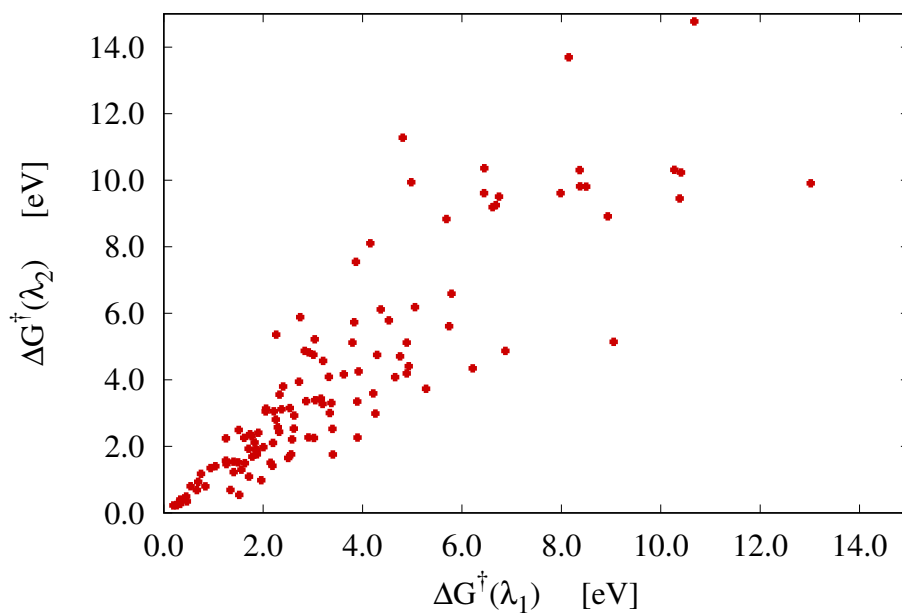

Figure S4: Comparison of  $\Delta G^\ddagger$  calculated with  $\lambda_1$  and  $\lambda_2$ . Equation of the linear fit is  $f(x) = 1.130x + 0.207$ , with  $R^2 = 0.682$ .

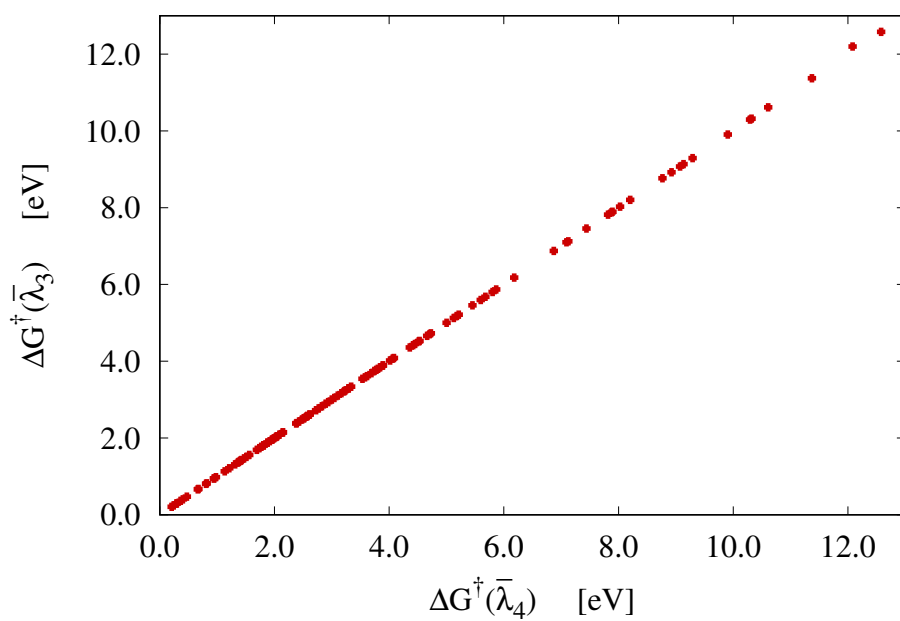

Figure S5: Comparison of  $\Delta G^\ddagger$  calculated with  $\bar{\lambda}_3$  and  $\bar{\lambda}_4$ . Equation of the linear fit is  $f(x) = 1.001x - 0.003$ , with  $R^2 = 0.999987$ .

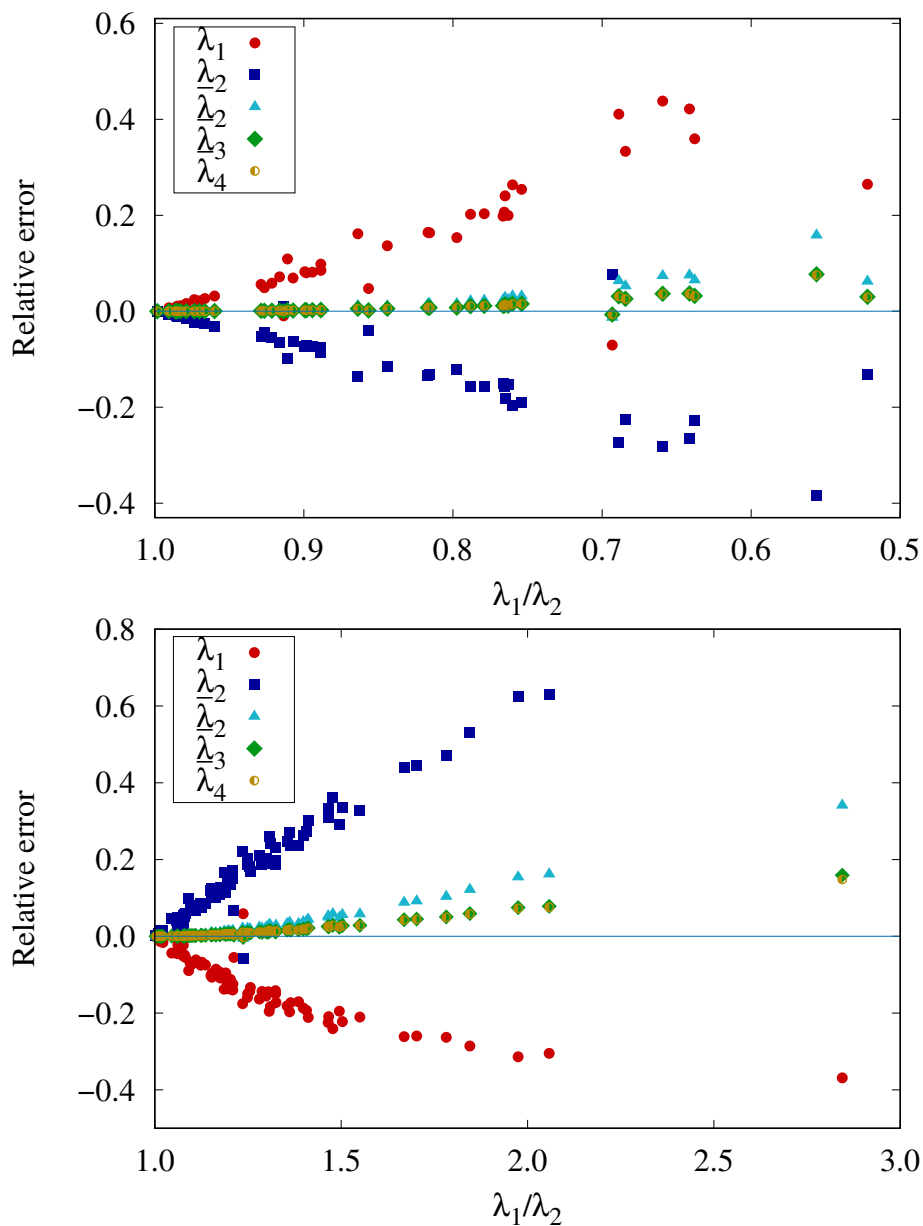

Figure S6: Variation of the relative error in the calculation of the transition state energy ( $\Delta G^\ddagger$ ) from Marcus formula with  $\lambda_1$ ,  $\lambda_2$ ,  $\bar{\lambda}_2$ ,  $\bar{\lambda}_3$  and  $\bar{\lambda}_4$  with respect to the reference  $\bar{\lambda}_1$ , as a function of the reorganization energies ratio,  $\lambda_1/\lambda_2$ . Values for all the 120 DA pairs are shown. Top:  $\lambda_1 < \lambda_2$  case. Bottom:  $\lambda_1 > \lambda_2$  case.

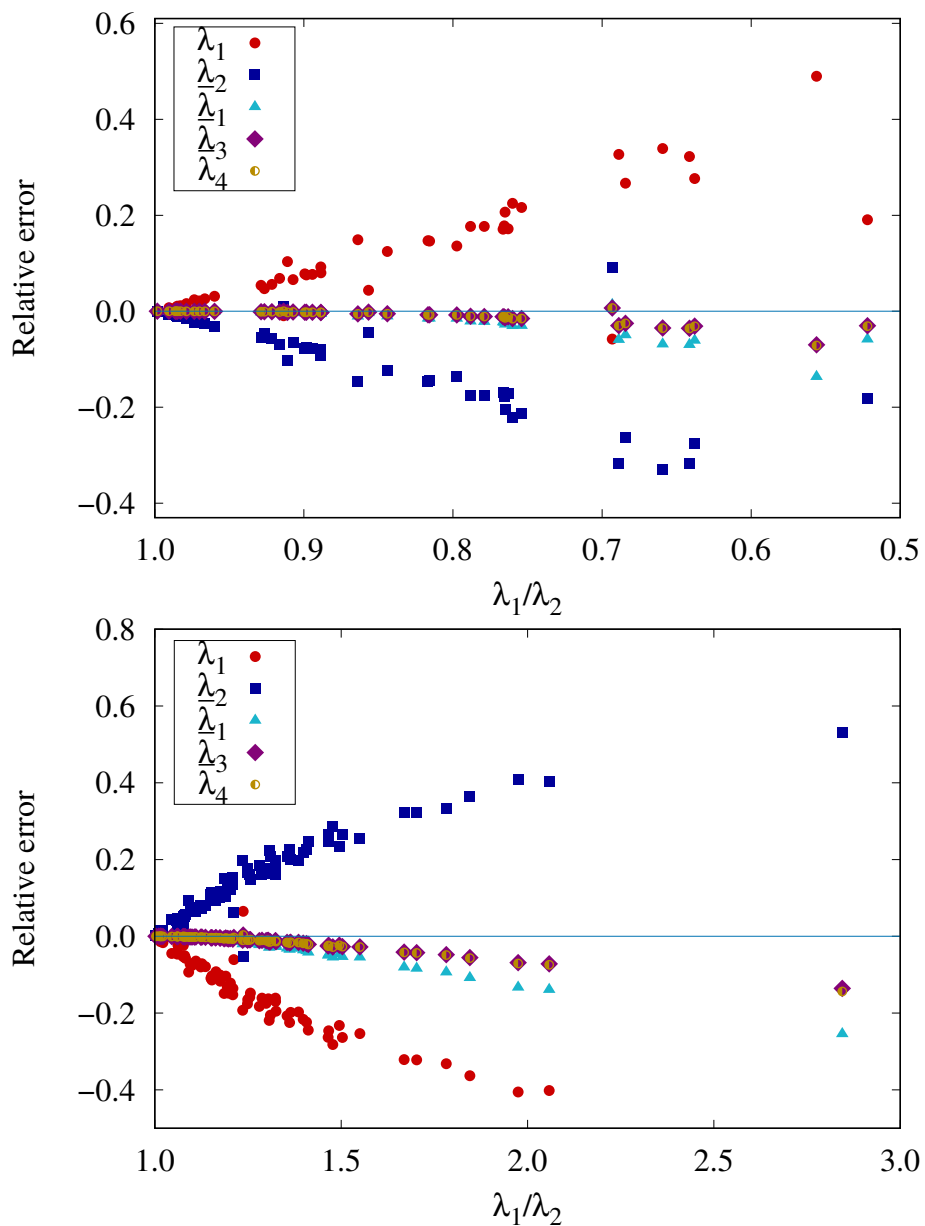

Figure S7: Variation of the relative error in the calculation of the transition state energy ( $\Delta G^\ddagger$ ) from Marcus formula with  $\lambda_1$ ,  $\lambda_2$ ,  $\bar{\lambda}_1$ ,  $\bar{\lambda}_3$  and  $\bar{\lambda}_4$  with respect to the reference  $\bar{\lambda}_2$ , as a function of the reorganization energies ratio,  $\lambda_1/\lambda_2$ . Values for all the 120 DA pairs are shown. Top:  $\lambda_1 < \lambda_2$  case. Bottom:  $\lambda_1 > \lambda_2$  case.



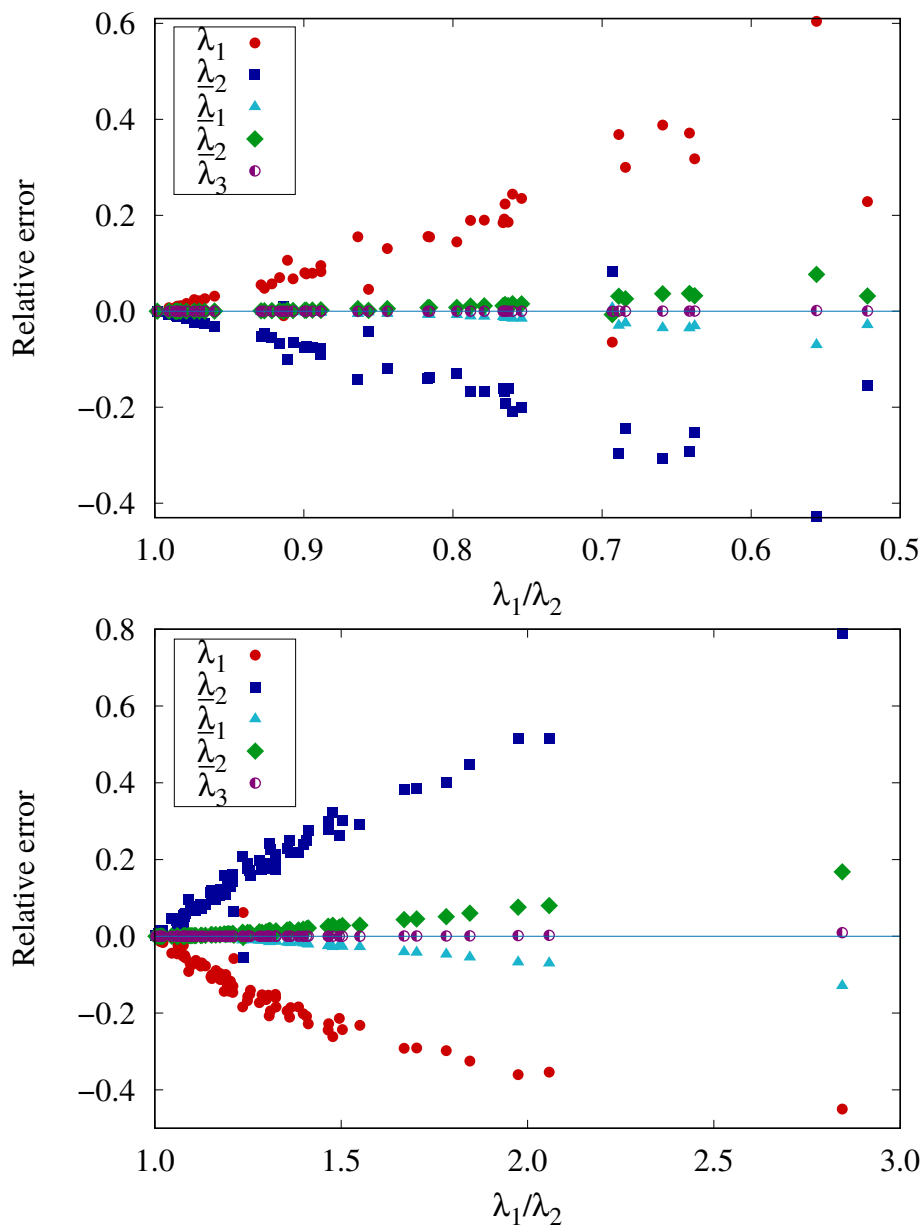

Figure S8: Variation of the relative error in the calculation of the transition state energy ( $\Delta G^\ddagger$ ) from Marcus formula with  $\lambda_1$ ,  $\lambda_2$ ,  $\bar{\lambda}_1$ ,  $\bar{\lambda}_2$  and  $\bar{\lambda}_3$  with respect to the reference  $\bar{\lambda}_4$ , as a function of the reorganization energies ratio,  $\lambda_1/\lambda_2$ . Values for all the 120 DA pairs are shown. Top:  $\lambda_1 < \lambda_2$  case. Bottom:  $\lambda_1 > \lambda_2$  case.

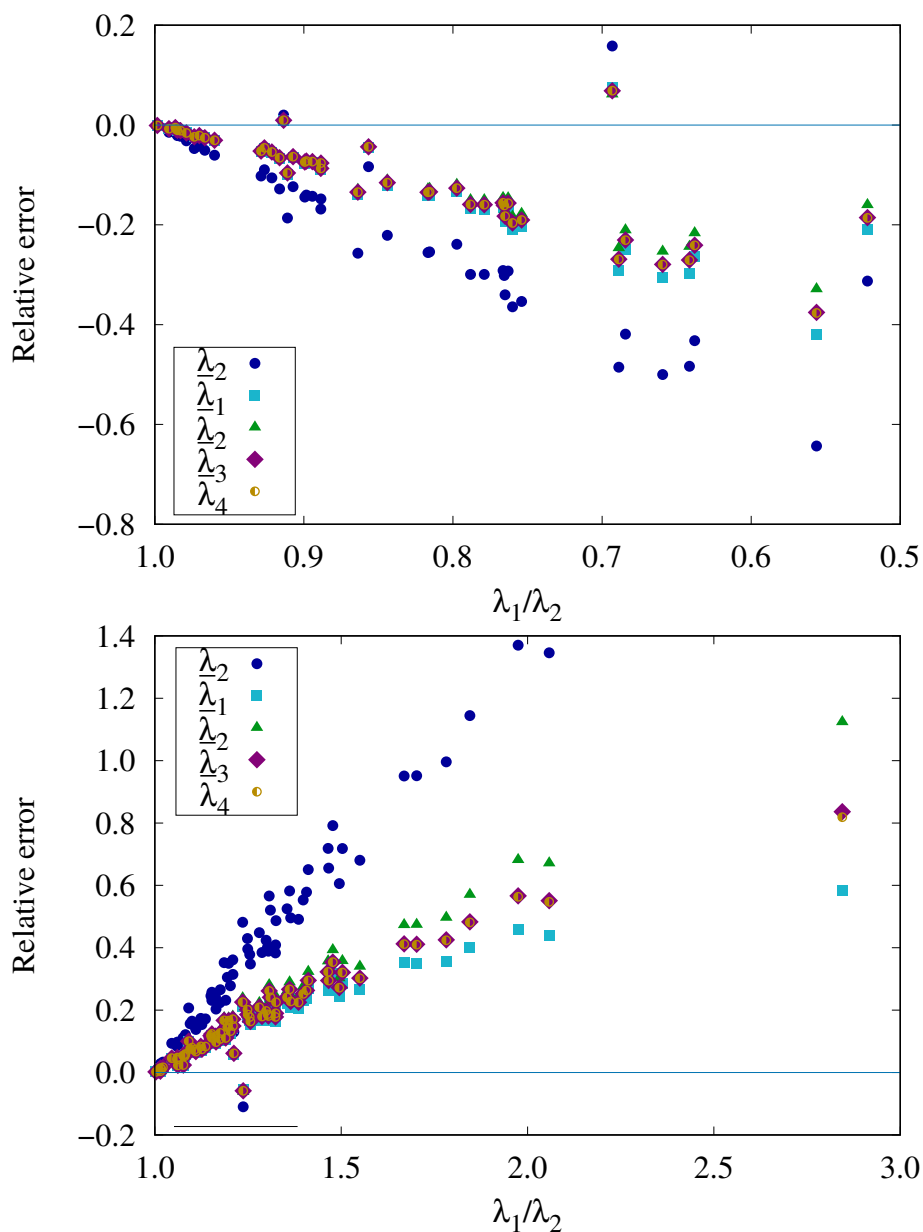

Figure S9: Variation of the relative error in the calculation of the transition state energy ( $\Delta G^\ddagger$ ) from Marcus formula with  $\lambda_2$ ,  $\bar{\lambda}_1$ ,  $\bar{\lambda}_2$ ,  $\bar{\lambda}_3$  and  $\bar{\lambda}_4$  with respect to the reference  $\lambda_1$ , as a function of the reorganization energies ratio,  $\lambda_1/\lambda_2$ . Values for all the 120 DA pairs are shown. Top:  $\lambda_1 < \lambda_2$  case. Bottom:  $\lambda_1 > \lambda_2$  case.

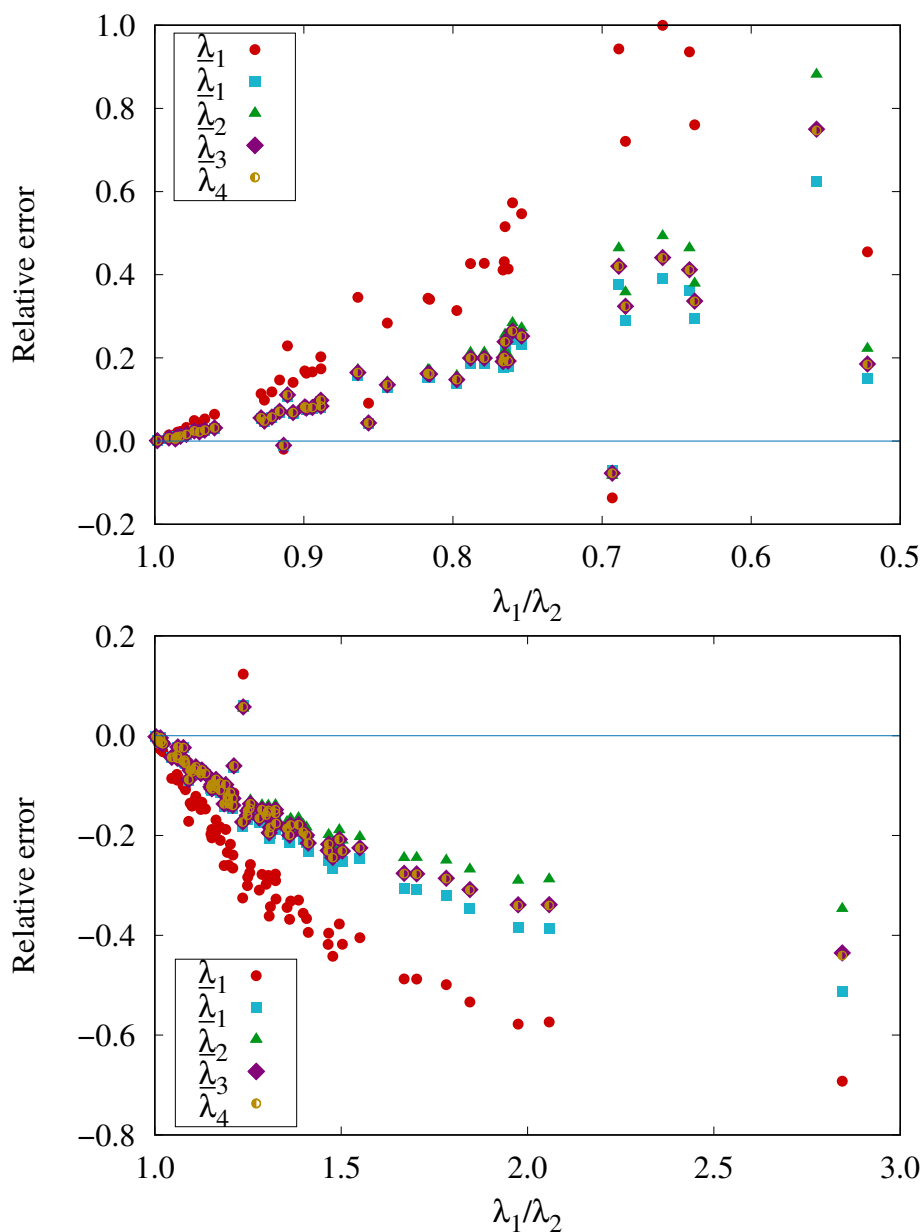

Figure S10: Variation of the relative error in the calculation of the transition state energy ( $\Delta G^\ddagger$ ) from Marcus formula with  $\lambda_1$ ,  $\bar{\lambda}_1$ ,  $\bar{\lambda}_2$ ,  $\bar{\lambda}_3$  and  $\bar{\lambda}_4$  with respect to the reference  $\lambda_2$ , as a function of the reorganization energies ratio,  $\lambda_1/\lambda_2$ . Values for all the 120 DA pairs are shown. Top:  $\lambda_1 < \lambda_2$  case. Bottom:  $\lambda_1 > \lambda_2$  case.
